# Supplementary material for: Performance of multigene testing in cytologically indeterminate thyroid nodules and molecular risk stratification
Source: PeerJ. 2023 Sep 18;11:e16054. doi: 10.7717/peerj.16054 (PMC10512961; doi:10.7717/peerj.16054)
Supplement: Supplemental Information 1 [file peerj-11-16054-s001.xlsx]

## Sheet: mutants
List of 14 thyroid cancer-related genes
AKT1
BRAF
CTNNB1
EIF1AX
HRAS
KRAS
NRAS
PAX8
PIK3CA
PTEN
RET
TERT
THADA
TP53

## Sheet: rearrangements
List of 21 thyroid cancer-related gene rearrangements
ACBD5-RET
AFAP1L2-RET
CALM2-ALK
CCDC6-RET
ATG10-RET
RALGAPA2-RET
ERC1-RET
ETV6-NTRK3
ETV6-RET
FLNC-BRAF
FMNL2-ALK
KIAA1217-RET
KIAA1594-BRAF
KIF20B-RET
NCOA4-RET
SND1-BRAF
PAK1-BRAF
PAX8-PPARγ
PIBF1-RET
STRN-ALK
BRAF-PXK
